# Supplementary material
Source: MDPI journal article supplement (https://www.mdpi.com/2077-1312/6/3/106)
Supplement: s1 [file s1]

**Supplementary Materials:****Table S1.** Aerial overflight surveys for the *MV Marathassa* oil spill.

| Date     | Time  | Observations                                                                  |
|----------|-------|-------------------------------------------------------------------------------|
| 8 April  | 11:00 | No pollution observed                                                         |
|          | 12:20 | 2800L oil on water in the English Bay; No shoreline impact                    |
| 9 April  | 18:06 | 667.7 L of oil on water in the English Bay                                    |
|          | 19:00 | Shoreline contamination reported at the beach of the English Bay              |
| 10 April | 09:12 | 40 L of oil on water in the English Bay                                       |
|          | 14:10 | 5.9 L of oil on water; non-recoverable oil                                    |
| 12 April | 10:36 | A light sheen (about 0.3 L) of oil off the stern of the <i>M/V Marathassa</i> |

**Table S2.** Western Canada Marine Response Corporation's (WCMRC) response to the spill

| # of vessels | 1                                                                | 2                                                                | 3                                                                         |
|--------------|------------------------------------------------------------------|------------------------------------------------------------------|---------------------------------------------------------------------------|
| Strategies   | Began collecting fuel oil and skimming at 21:25, on 8 April 2015 | Began collecting fuel oil and skimming at 22:15, on 8 April 2015 | Began collecting fuel oil and skimming at 23:30, on 8 April 2015          |
|              |                                                                  |                                                                  | Began booming around <i>MV Marathassa</i> at 04:36-05:25, on 9 April 2015 |

**Table S3.** The chemical composition of IFO 380 in the OSCAR model.

| Substance Name               | Fraction in IFO380 (%) |
|------------------------------|------------------------|
| C5-saturates (n-/iso-/cyclo) | 0.0000                 |
| C6-saturates (n-/iso-/cyclo) | 0.0000                 |
| Benzene                      | 0.0000                 |
| C7-saturates (n-/iso-/cyclo) | 0.0000                 |
| C1-Benzene (Toluene) et. B   | 0.0000                 |
| C8-saturates (n-/iso-/cyclo) | 0.0000                 |

|                                                                                     |         |
|-------------------------------------------------------------------------------------|---------|
| C2-Benzene (xylenes; using O-xylene)                                                | 0.0000  |
| C9-saturates (n-/iso-/cyclo)                                                        | 0.0000  |
| C3-Benzene                                                                          | 0.0913  |
| C10-saturates (n-/iso-/cyclo)                                                       | 0.2382  |
| C4 and C4 Benzenes                                                                  | 0.0082  |
| C11-C12 (total sat + aro)                                                           | 0.4458  |
| Naphthalenes 1 (C0-C1-alkylated)                                                    | 0.0240  |
| C13-C14 (total sat + aro)                                                           | 0.4815  |
| Naphthalenes 2 (C2-C3-alkylated)                                                    | 0.0286  |
| C15-C16 (total sat + aro)                                                           | 0.3977  |
| PAH 1 (Medium soluble polyaromatic hydrocarbons (3 rings-non-alkylated; < 4 rings)) | 0.0172  |
| C17-C18 (total sat + aro)                                                           | 0.4928  |
| C19-C20 (total sat + aro)                                                           | 0.3784  |
| C21-C25 (total sat + aro)                                                           | 0.8621  |
| PAH 2 (Low soluble polyaromatic hydrocarbons (3 rings-alkylated; 4-5+ rings))       | 0.0079  |
| C25 (total)                                                                         | 96.5153 |

**Table S4.** Assumptions for mechanical response strategies (recovery actions).

| # of vessels                             | 1                                             | 2                                             | 3                                             | 4                                      |
|------------------------------------------|-----------------------------------------------|-----------------------------------------------|-----------------------------------------------|----------------------------------------|
| Cruise Speed (knot)                      | 15                                            | 15                                            | 15                                            | 15                                     |
| Recover efficiency (%)                   | 80                                            | 80                                            | 80                                            | 80                                     |
| Skimmer / Boom                           | 160 m <sup>3</sup> /hr                        | 160 m <sup>3</sup> /hr                        | 160 m <sup>3</sup> /hr                        | 180 m                                  |
| Thickness limit for recoverable oil (mm) | 0.1                                           | 0.1                                           | 0.1                                           | -                                      |
| Strategy                                 | From 2100 h, April 8 <sup>th</sup> to the end | From 2200 h, April 8 <sup>th</sup> to the end | From 2300 h, April 8 <sup>th</sup> to the end | 0400 h – 0500 h, April 9 <sup>th</sup> |

**Table S5.** Factors setting in each simulation

| Scenario # | Spilled volume (L) | Wind | Duration (hours) | Response |
|------------|--------------------|------|------------------|----------|
| 1          | 2800               | ×    | 2                | ×        |
| 2          | 2800               | √    | 2                | ×        |
| 3          | 2800               | ×    | 22               | ×        |
| 4          | 2800               | √    | 22               | ×        |
| 5          | 2800               | ×    | 2                | √        |
| 6          | 2800               | √    | 2                | √        |
| 7          | 2800               | ×    | 22               | √        |
| 8          | 2800               | √    | 22               | √        |

Each scenario has 5 potential start-releasing time with 12:00, 13:00, 14:00, 15:00, and 16:00.

**Table S6.** The influence of studied factors on the mass balance of *MV Marathassa* spilled oil.

| Start-releasing time | Scenario # | Mass Balance (%) |            |              |           |        |             |           |
|----------------------|------------|------------------|------------|--------------|-----------|--------|-------------|-----------|
|                      |            | Surface          | Atmosphere | Water Column | Sediments | Ashore | Biodegraded | Recovered |
| 12:00                | 1          | 15.1             | 1          | 0            | 0         | 83.6   | 0.3         | 0         |
|                      | 2          | 0                | 0.8        | 0            | 0         | 98.2   | 1           | 0         |
|                      | 3          | 92.4             | 1.2        | 0            | 0         | 6.3    | 0.1         | 0         |
|                      | 4          | 54.4             | 1.3        | 0.3          | 0         | 43.7   | 0.3         | 0         |
|                      | 5          | 11.2             | 2          | 0.2          | 0         | 78.3   | 0.3         | 8         |
|                      | 6          | 0                | 1.6        | 0.1          | 0.1       | 89.5   | 0.8         | 7.9       |
|                      | 7          | 88.4             | 1.5        | 0.1          | 0         | 5.9    | 0.1         | 4.1       |

|       |   |      |     |     |     |      |     |      |
|-------|---|------|-----|-----|-----|------|-----|------|
| 13:00 | 8 | 17.3 | 0.7 | 0.2 | 0   | 23.4 | 0.2 | 55.1 |
|       | 1 | 16.9 | 1   | 0   | 0   | 81.9 | 0.3 | 0    |
|       | 2 | 4.8  | 1   | 0.2 | 0   | 93.3 | 0.7 | 0    |
|       | 3 | 98.9 | 0.9 | 0   | 0   | 0    | 0.1 | 0    |
|       | 4 | 49.8 | 1.3 | 0.3 | 0   | 48.4 | 0.3 | 0    |
|       | 5 | 13   | 2   | 0   | 0   | 76.7 | 0.3 | 8    |
|       | 6 | 0.9  | 1.9 | 0.6 | 0.1 | 87.9 | 0.6 | 7.9  |
|       | 7 | 89.7 | 1.5 | 0.1 | 0   | 4.5  | 0.1 | 4.1  |
| 14:00 | 8 | 28.9 | 1   | 0.3 | 0   | 30   | 0.2 | 39.7 |
|       | 1 | 52.5 | 1   | 0   | 0   | 46.3 | 0.2 | 0    |
|       | 2 | 7.4  | 1.3 | 0.6 | 0   | 90.2 | 0.4 | 0    |
|       | 3 | 95.9 | 1.2 | 0   | 0   | 2.8  | 0.1 | 0    |
|       | 4 | 24.9 | 1.4 | 0.4 | 0   | 72.9 | 0.4 | 0    |
|       | 5 | 9.6  | 0.7 | 0.7 | 0   | 9.2  | 0.1 | 79.7 |
|       | 6 | 1.1  | 0.8 | 1.2 | 0   | 17.4 | 0.1 | 79.3 |
|       | 7 | 28.2 | 0.7 | 0   | 0   | 1    | 0   | 70.1 |
| 15:00 | 8 | 13.4 | 0.7 | 0.2 | 0   | 23.7 | 0.1 | 61.8 |
|       | 1 | 91.3 | 1   | 0   | 0   | 7.5  | 0.2 | 0    |
|       | 2 | 25.9 | 1.5 | 0.8 | 0   | 71.6 | 0.2 | 0    |
|       | 3 | 97.5 | 1.2 | 0   | 0   | 1.2  | 0.1 | 0    |
|       | 4 | 43.1 | 1.4 | 0.5 | 0   | 54.6 | 0.4 | 0    |
|       | 5 | 60.3 | 1   | 0.2 | 0   | 1.8  | 0.1 | 36.6 |
|       | 6 | 16.3 | 1.3 | 0.9 | 0   | 40.3 | 0.2 | 40.9 |
|       | 7 | 93   | 1.5 | 0.1 | 0   | 1.8  | 0.1 | 3.5  |
| 16:00 | 8 | 10.1 | 0.7 | 0.2 | 0   | 23.3 | 0.1 | 65.5 |
|       | 1 | 98.7 | 1.1 | 0   | 0   | 0.1  | 0.1 | 0    |
|       | 2 | 45.7 | 1.6 | 1.4 | 0   | 51   | 0.2 | 0    |

|   |      |     |     |     |      |     |      |
|---|------|-----|-----|-----|------|-----|------|
| 3 | 97.3 | 1.2 | 0   | 0   | 1.5  | 0.1 | 0    |
| 4 | 99.2 | 0.7 | 0   | 0   | 0    | 0   | 0    |
| 5 | 89.4 | 2.1 | 0.2 | 0   | 0.2  | 0.1 | 8    |
| 6 | 31.2 | 2   | 1.5 | 0.1 | 56.9 | 0.2 | 8    |
| 7 | 93.6 | 1.5 | 0.1 | 0   | 1.4  | 0.1 | 3.3  |
| 8 | 8.8  | 0.7 | 0.3 | 0   | 22.1 | 0.1 | 68.1 |

Detail factors in each scenario was showed in Table S5.

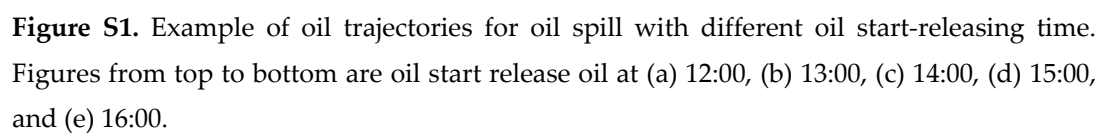

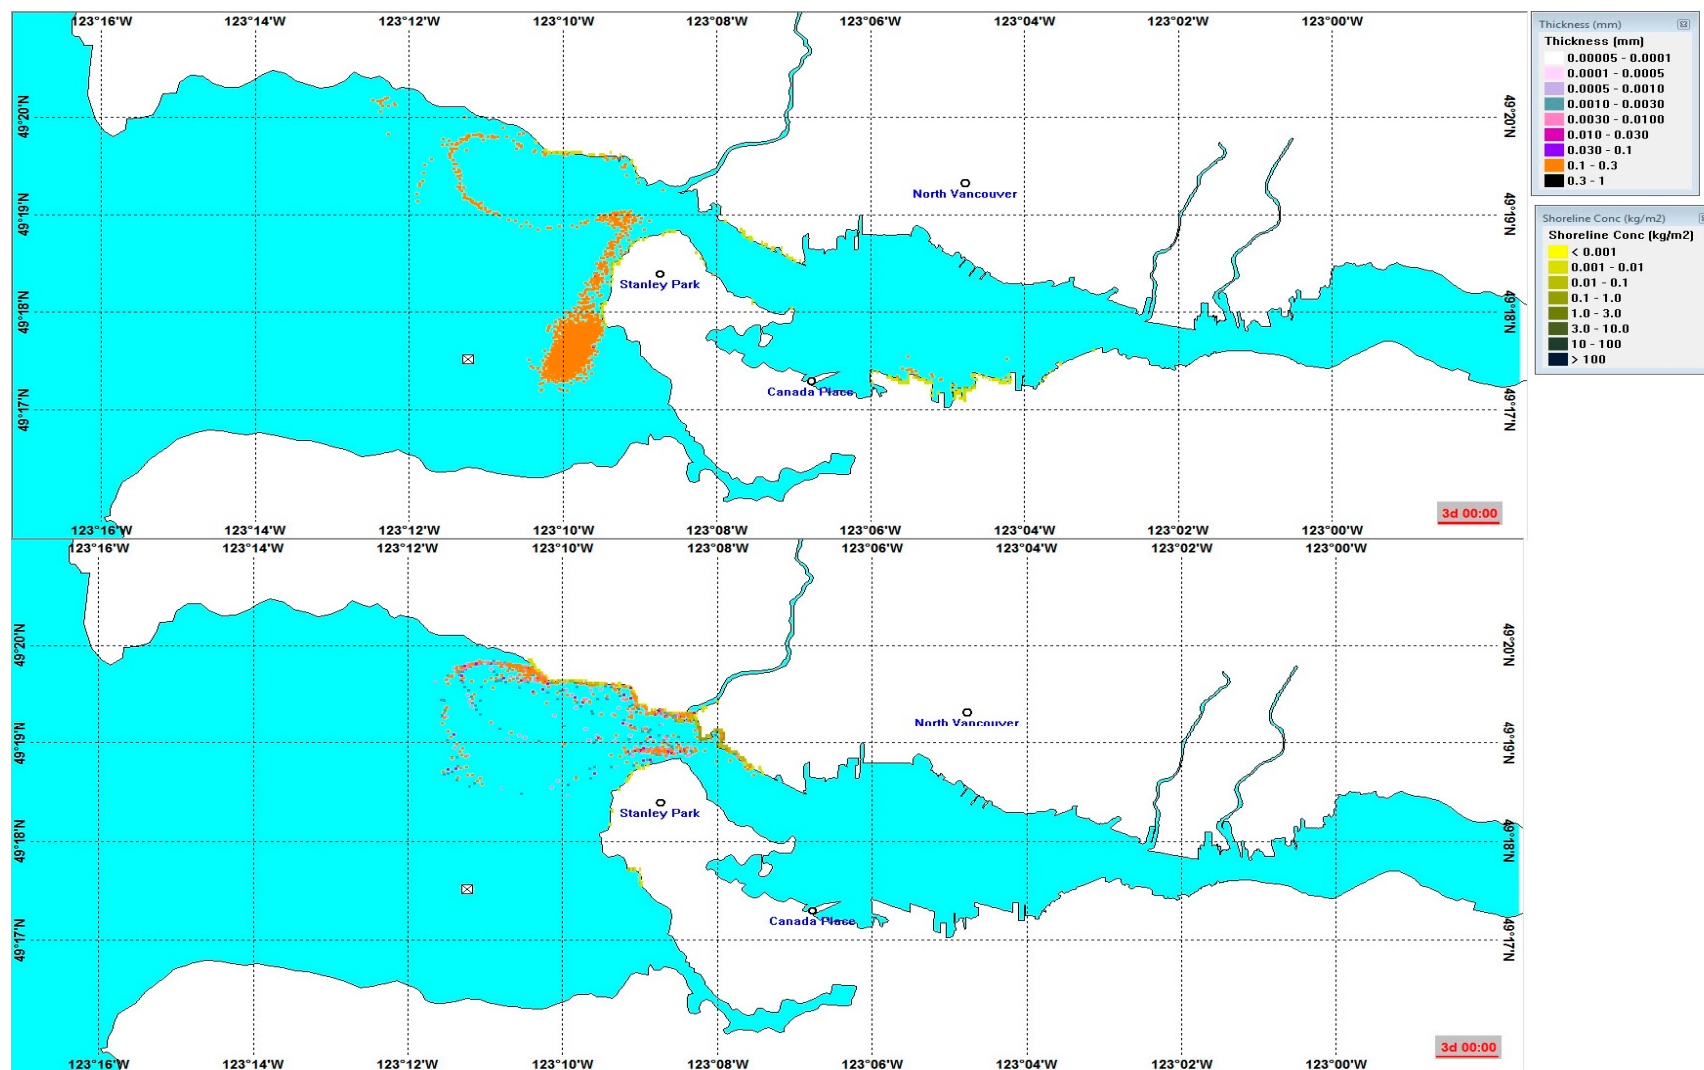

Figure S2. Example of oil trajectories for spilled oil forced without wind (top) or with wind (bottom).

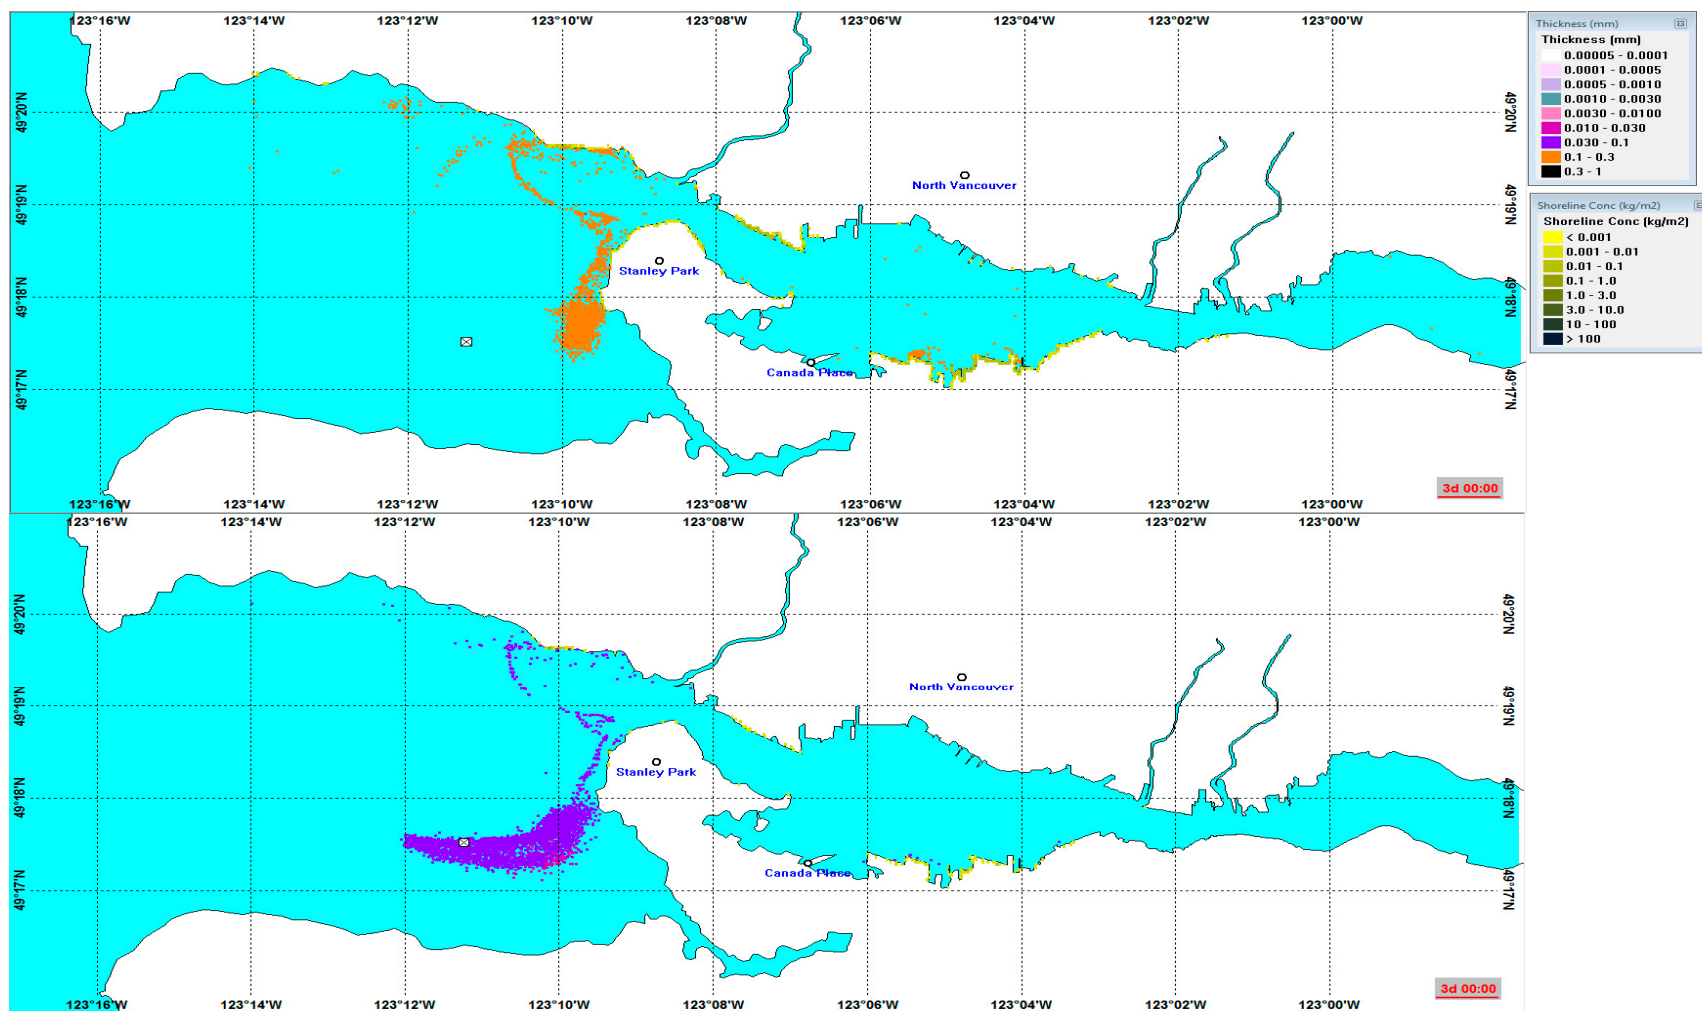

**Figure S3.** Example of oil trajectories for oil discharge instantly (top) or continuously (bottom).

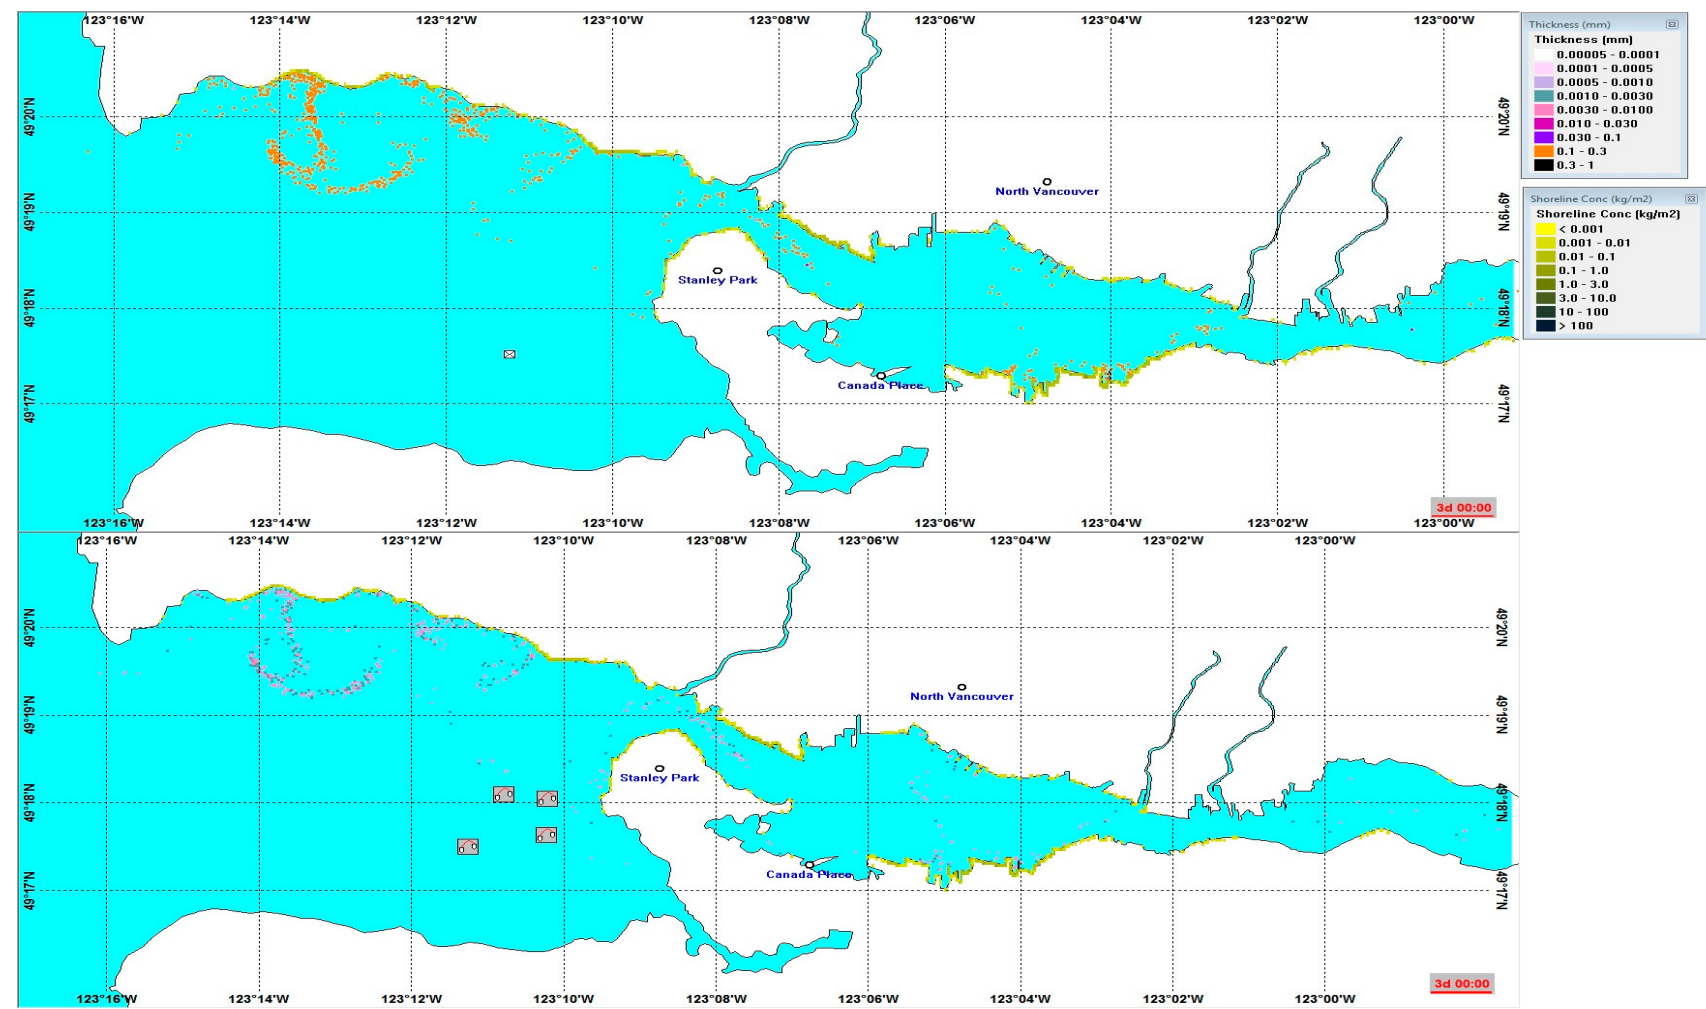

Figure S4. Example of oil trajectories for oil spill without (top) or taken (bottom) recovery actions.

Table S7. Water surface contaminant comparison. The simulated results were compared with observation data.

| Time to<br>start<br>spill | Scenarios<br># | Labels of surface contaminant |   |   |   |   |   |   |   |   |    | Matches<br>(%) |
|---------------------------|----------------|-------------------------------|---|---|---|---|---|---|---|---|----|----------------|
|                           |                | 1                             | 2 | 3 | 4 | 5 | 6 | 7 | 8 | 9 | 10 |                |
| 12:00                     | 1              | ×                             | × | √ | × | √ | √ | √ | × | × | ×  | 40             |
|                           | 2              | √                             | × | × | × | × | × | × | × | × | ×  | 10             |
|                           | 3              | ×                             | × | × | × | √ | × | √ | √ | √ | ×  | 40             |
|                           | 4              | ×                             | × | √ | √ | √ | √ | √ | × | √ | ×  | 60             |
|                           | 5              | ×                             | × | √ | × | √ | √ | √ | × | × | ×  | 40             |
|                           | 6              | √                             | × | × | × | × | × | × | × | × | ×  | 10             |
|                           | 7              | ×                             | × | √ | √ | × | √ | √ | √ | √ | ×  | 60             |
|                           | 8              | ×                             | × | √ | √ | √ | √ | √ | × | √ | ×  | 60             |
| 13:00                     | 1              | ×                             | × | √ | × | × | × | √ | × | × | ×  | 20             |
|                           | 2              | √                             | × | × | × | × | × | × | × | √ | ×  | 20             |
|                           | 3              | ×                             | × | × | × | × | × | × | √ | √ | ×  | 20             |
|                           | 4              | √                             | × | √ | × | √ | √ | √ | × | √ | ×  | 60             |
|                           | 5              | ×                             | × | √ | √ | × | √ | √ | × | × | ×  | 40             |
|                           | 6              | ×                             | × | × | × | × | × | × | √ | √ | ×  | 20             |
|                           | 7              | ×                             | × | × | × | × | × | × | √ | × | ×  | 10             |
|                           | 8              | √                             | × | √ | × | √ | √ | √ | × | √ | ×  | 60             |
| 14:00                     | 1              | ×                             | × | × | × | × | × | × | × | × | ×  | 0              |
|                           | 2              | √                             | × | × | × | × | × | × | √ | √ | ×  | 30             |
|                           | 3              | ×                             | × | × | × | × | × | × | √ | √ | ×  | 20             |
|                           | 4              | √                             | × | √ | √ | √ | × | √ | √ | √ | ×  | 70             |
|                           | 5              | ×                             | × | × | × | × | × | × | × | × | ×  | 0              |
|                           | 6              | √                             | × | × | × | × | × | × | √ | √ | ×  | 30             |

|       |   |   |   |   |   |   |   |   |   |   |   |   |    |
|-------|---|---|---|---|---|---|---|---|---|---|---|---|----|
| 15:00 | 7 | × | × | × | × | × | × | × | × | √ | √ | × | 20 |
|       | 8 | √ | × | √ | √ | × | √ | √ | √ | √ | √ | × | 70 |
|       | 1 | × | × | × | × | × | × | × | × | × | × | × | 0  |
|       | 2 | × | × | × | × | × | × | × | × | √ | √ | × | 20 |
|       | 3 | × | × | × | × | × | × | × | × | × | √ | × | 10 |
|       | 4 | × | √ | √ | √ | √ | × | √ | √ | √ | √ | × | 70 |
|       | 5 | × | × | × | × | × | × | × | × | × | × | × | 0  |
|       | 6 | √ | × | × | × | × | × | × | × | √ | √ | × | 30 |
| 16:00 | 7 | × | × | × | × | × | × | × | × | √ | √ | × | 20 |
|       | 8 | × | √ | √ | √ | √ | × | √ | √ | √ | √ | × | 70 |
|       | 1 | × | × | × | × | × | × | × | × | × | × | × | 0  |
|       | 2 | × | × | × | × | × | × | × | × | × | √ | × | 10 |
|       | 3 | × | × | × | × | × | × | × | × | × | √ | × | 10 |
|       | 4 | × | × | √ | √ | × | √ | √ | √ | √ | √ | × | 60 |
|       | 5 | × | × | × | × | × | × | × | × | × | × | × | 0  |
|       | 6 | × | × | × | × | × | × | × | × | × | √ | × | 10 |
|       | 7 | × | × | × | × | × | × | × | × | × | √ | × | 10 |
|       | 8 | × | × | √ | √ | × | √ | √ | √ | √ | √ | × | 60 |

Detail factors in each scenario was showed in Table S5. “×” represents the simulated results does not match with the observed data; “√” indicates the simulated results matches the observed data.

**Table S8.** Shoreline contaminant comparison. The simulated results were compared with observation data.

| Time to<br>start spill | Scenarios<br># | Labels of shoreline contaminant |   |   |   |   |   |   |   |   |   |   |   |   |   |   |   | Matches<br>(%) |
|------------------------|----------------|---------------------------------|---|---|---|---|---|---|---|---|---|---|---|---|---|---|---|----------------|
|                        |                | A                               | B | C | D | E | F | G | H | I | J | K | L | M | N | O | P |                |
| 12:00                  | 1              | √                               | √ | √ | √ | √ | × | √ | √ | √ | √ | × | √ | × | × | √ | × | 68.75          |
|                        | 2              | ×                               | × | × | × | × | × | √ | √ | √ | × | × | √ | √ | × | √ | × | 37.5           |

|       |   |   |   |   |   |   |   |   |   |   |   |   |   |   |   |   |   |       |
|-------|---|---|---|---|---|---|---|---|---|---|---|---|---|---|---|---|---|-------|
| 13:00 | 3 | √ | √ | √ | √ | √ | × | √ | √ | √ | √ | × | √ | × | × | √ | × | 68.75 |
|       | 4 | × | √ | √ | √ | √ | × | √ | √ | √ | √ | × | √ | × | × | √ | × | 62.5  |
|       | 5 | √ | √ | √ | √ | √ | × | √ | √ | √ | √ | × | √ | × | × | √ | × | 68.75 |
|       | 6 | × | √ | × | × | × | × | √ | √ | √ | × | × | √ | √ | × | √ | × | 43.75 |
|       | 7 | √ | √ | √ | √ | × | √ | √ | √ | √ | × | √ | √ | × | × | √ | × | 68.75 |
|       | 8 | × | √ | √ | √ | × | √ | √ | √ | √ | √ | × | √ | × | √ | × | × | 62.5  |
|       | 1 | √ | √ | √ | √ | √ | × | √ | √ | √ | √ | × | √ | × | × | √ | × | 68.75 |
|       | 2 | × | √ | √ | √ | × | × | √ | √ | √ | × | × | √ | √ | × | √ | × | 56.25 |
|       | 3 | √ | √ | √ | √ | √ | × | √ | √ | √ | √ | × | √ | × | × | √ | × | 68.75 |
|       | 4 | × | √ | √ | √ | √ | × | √ | √ | √ | √ | × | √ | × | √ | × | × | 62.5  |
|       | 5 | √ | √ | √ | √ | √ | × | √ | √ | √ | √ | × | √ | × | × | √ | × | 68.75 |
|       | 6 | × | √ | × | √ | √ | × | √ | √ | √ | × | × | √ | √ | × | √ | × | 56.25 |
|       | 7 | × | √ | √ | √ | √ | × | √ | √ | √ | √ | × | √ | × | × | √ | × | 68.75 |
|       | 8 | × | √ | √ | √ | √ | × | √ | √ | √ | √ | × | √ | × | √ | × | × | 62.5  |
|       | 1 | √ | √ | × | √ | √ | × | √ | √ | √ | √ | × | √ | × | × | √ | × | 37.5  |
|       | 2 | × | √ | × | √ | × | √ | √ | √ | √ | × | √ | √ | √ | × | √ | × | 37.5  |
|       | 3 | × | √ | × | √ | √ | × | √ | √ | √ | √ | √ | √ | × | × | √ | × | 37.5  |
|       | 4 | × | √ | √ | √ | √ | × | √ | √ | √ | √ | × | √ | × | √ | × | × | 62.5  |
|       | 5 | √ | √ | √ | √ | √ | × | √ | √ | √ | √ | × | √ | × | × | √ | × | 68.75 |
|       | 6 | × | √ | × | √ | √ | × | √ | √ | × | × | × | √ | √ | × | √ | × | 50    |
|       | 7 | × | √ | × | √ | √ | × | √ | √ | √ | √ | × | √ | √ | × | √ | × | 62.5  |
|       | 8 | × | √ | √ | √ | √ | × | √ | √ | √ | √ | × | √ | × | √ | × | × | 62.5  |
| 14:00 | 1 | × | √ | × | √ | √ | × | √ | √ | √ | √ | × | √ | × | × | √ | × | 43.75 |
|       | 2 | × | √ | × | √ | √ | √ | √ | √ | √ | × | √ | √ | √ | × | √ | × | 31.25 |
|       | 3 | × | √ | × | √ | √ | × | √ | √ | √ | √ | × | √ | √ | × | √ | × | 37.5  |

|       |   |   |   |   |   |   |   |   |   |   |   |   |   |   |   |   |   |       |
|-------|---|---|---|---|---|---|---|---|---|---|---|---|---|---|---|---|---|-------|
| 16:00 | 4 | × | √ | √ | √ | √ | × | √ | √ | √ | √ | × | √ | × | √ | × | × | 62.5  |
|       | 5 | × | √ | × | √ | √ | × | √ | √ | √ | √ | × | √ | × | × | √ | × | 56.25 |
|       | 6 | × | √ | × | √ | √ | √ | √ | √ | √ | √ | × | √ | √ | × | √ | × | 68.75 |
|       | 7 | × | √ | × | √ | √ | × | √ | √ | √ | √ | × | √ | √ | × | √ | × | 62.5  |
|       | 8 | × | √ | √ | √ | √ | × | √ | √ | √ | √ | × | √ | × | √ | × | × | 62.5  |
|       | 1 | × | × | × | × | √ | × | √ | √ | √ | × | √ | √ | √ | × | √ | × | 50    |
|       | 2 | × | √ | × | √ | √ | √ | √ | √ | √ | × | × | √ | √ | × | √ | × | 37.5  |
|       | 3 | × | × | × | × | × | × | √ | √ | √ | × | √ | √ | √ | × | √ | × | 56.25 |
|       | 4 | × | √ | √ | √ | √ | × | √ | √ | √ | √ | √ | √ | × | √ | × | × | 68.75 |
|       | 5 | × | × | × | × | √ | × | √ | √ | √ | √ | × | √ | √ | × | √ | × | 50    |
|       | 6 | × | √ | × | √ | √ | × | √ | √ | √ | × | × | √ | √ | × | √ | × | 56.25 |
|       | 7 | × | × | × | × | √ | × | √ | √ | √ | × | √ | √ | √ | × | √ | × | 50    |
|       | 8 | × | √ | √ | √ | √ | × | √ | √ | √ | √ | × | √ | × | √ | × | × | 62.5  |

Detail factors in each scenario was showed in Table S5. “×” represents the simulated results does not match with the observed data; “√” indicates the simulated results matches the observed data.
